# Supplementary material for: Global Expression Profiling of Transcription Factor Genes Provides New Insights into Pathogenicity and Stress Responses in the Rice Blast Fungus
Source: PubMed Central journal article supplement (PMC3675110; doi:10.1371/journal.ppat.1003350), 2013-06-06
Supplement: ppat.1003350.s003.pdf [file ppat.1003350.s003.pdf]

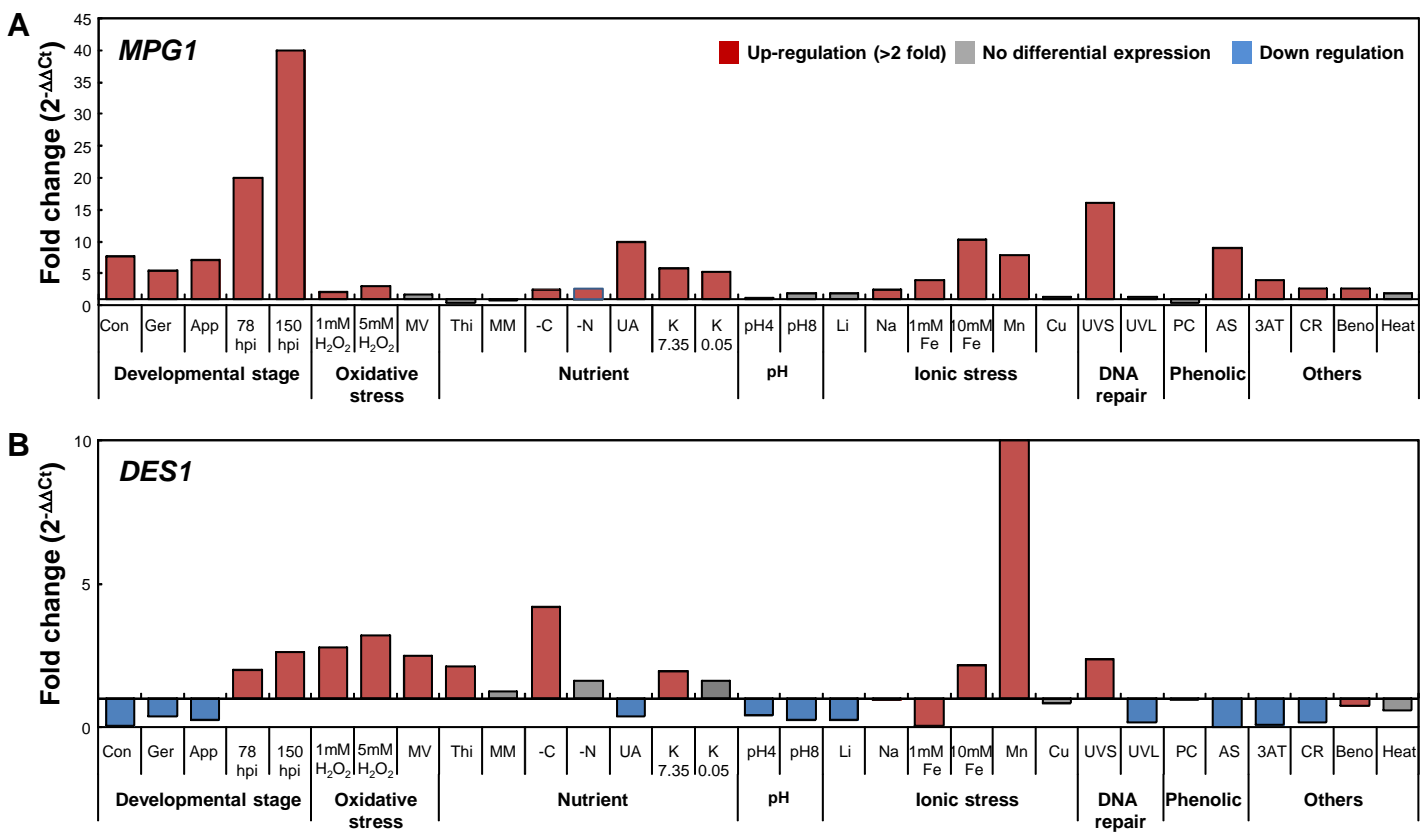

**Figure S3.** Expression patterns of the *MPG1* and *DES1* genes in wild type strain KJ201 under 31 different conditions. Fold changes of (A) *MPG1* and (B) *DES1* under these conditions are presented. Experimental conditions and abbreviations are listed in Table S4.
