# Supplementary material for: Global Expression Profiling of Transcription Factor Genes Provides New Insights into Pathogenicity and Stress Responses in the Rice Blast Fungus
Source: PubMed Central journal article supplement (PMC3675110; doi:10.1371/journal.ppat.1003350), 2013-06-06
Supplement: ppat.1003350.s005.pdf [file ppat.1003350.s005.pdf]

| T-DNA insertion mutants                                                                                  | No. TFs | Conidiation | Conidial morphology | Conidial germination | Appressorium Formation | Pathogenicity |
|----------------------------------------------------------------------------------------------------------|---------|-------------|---------------------|----------------------|------------------------|---------------|
| <b>ATMT0651A4</b><br>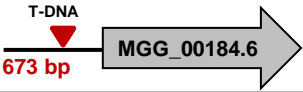   | HOX2    | No conidia  | -                   | -                    | -                      | -             |
| <b>ATMT0094A6</b><br>   | TF220   | Reduced     | Normal              | <50%                 | <50%                   | No disease    |
| <b>ATMT0104A6</b><br>   | TF116   | Reduced     | Normal              | >50%                 | No App.                | Reduced       |
| <b>ATMT0068B3</b><br>   | TF041   | Reduced     | Normal              | >50%                 | No App.                | -             |
| <b>ATMT0349D2</b><br>   | TF031   | Reduced     | no record           | >50%                 | >50%                   | Normal        |
| <b>ATMT0052B2</b><br>   | TF233   | Normal      | Abnormal            | <50%                 | <50%                   | No disease    |
| <b>ATMT0591D1</b><br> | TF260   | Normal      | Abnormal            | >50%                 | <50%                   | Reduced       |
| <b>ATMT0034B1</b><br> | TF150   | Normal      | Abnormal            | >50%                 | >50%                   | No disease    |

**Figure S5.** T-DNA insertion sites in eight mutants defective in conidiation-specific TF genes and resulting phenotypes. Phenotypes of these mutants are derived from *Magnaporthe oryzae* T-DNA insertion mutant library (<http://atmt.snu.ac.kr>).
