# Supplementary material for: Global Expression Profiling of Transcription Factor Genes Provides New Insights into Pathogenicity and Stress Responses in the Rice Blast Fungus
Source: PubMed Central journal article supplement (PMC3675110; doi:10.1371/journal.ppat.1003350), 2013-06-06
Supplement: ppat.1003350.s007.pdf [file ppat.1003350.s007.pdf]

Table S1. Transcription factors encoded by 23 fungal and Oomycete genomes

| Species name                           | Phylum/<br>Subphylum | No. of<br>ORFs | No. of TF<br>families | No. of<br>TFs | Ratio | Ref.*       |
|----------------------------------------|----------------------|----------------|-----------------------|---------------|-------|-------------|
| <i>Magnaporthe oryzae</i>              | Pezizomycotina       | 11,069         | 44                    | 495           | 4.49% | (1)         |
| <i>Fusarium graminearum</i>            | Pezizomycotina       | 13,339         | 44                    | 659           | 4.94% | (2)         |
| <i>Fusarium oxysporum</i>              | Pezizomycotina       | 17,735         | 43                    | 795           | 4.48% | NA          |
| <i>Neurospora crassa</i>               | Pezizomycotina       | 9,842          | 44                    | 420           | 4.27% | (3)         |
| <i>Podospora anserina</i>              | Pezizomycotina       | 10,596         | 41                    | 477           | 4.50% | (4)         |
| <i>Stagonospora nodorum</i>            | Pezizomycotina       | 15,893         | 39                    | 442           | 2.77% | (5)         |
| <i>Uncinocarpus reesii</i>             | Pezizomycotina       | 7,798          | 44                    | 321           | 4.12% |             |
| <i>Aspergillus fumigatus</i>           | Pezizomycotina       | 9,887          | 44                    | 562           | 5.68% | (6)         |
| <i>Aspergillus nidulans</i>            | Pezizomycotina       | 10,568         | 44                    | 608           | 5.75% | (7)         |
| <i>Yarrowia lipolytica</i>             | Saccharomycotina     | 6,524          | 42                    | 289           | 4.43% | (8)         |
| <i>Saccharomyces cerevisiae</i>        | Saccharomycotina     | 6,700          | 36                    | 295           | 4.41% | (9)         |
| <i>Candida glabrata</i>                | Saccharomycotina     | 5,165          | 38                    | 262           | 5.07% | (8)         |
| <i>Debaryomyces hansenii</i>           | Saccharomycotina     | 6,354          | 42                    | 324           | 5.10% | (8)         |
| <i>Candida albicans</i>                | Saccharomycotina     | 6,185          | 39                    | 317           | 5.13% | (10,<br>11) |
| <i>Schizosaccharomyces pombe</i>       | Taphrinomycotina     | 5,058          | 38                    | 222           | 4.39% | (12)        |
| <i>Cryptococcus neoformans</i>         | Basidiomycota        | 6,475          | 34                    | 307           | 4.74% | (13)        |
| <i>Phanerochaete<br/>chrysosporium</i> | Basidiomycota        | 10,048         | 37                    | 387           | 3.85% | (14)        |
| <i>Laccaria bicolor</i>                | Basidiomycota        | 20,614         | 39                    | 494           | 2.40% | (15)        |
| <i>Ustilago maydis</i>                 | Basidiomycota        | 6,689          | 40                    | 331           | 4.95% | (16)        |
| <i>Rhizopus oryzae</i>                 | Mucoromycotina       | 17,482         | 41                    | 1,110         | 6.35% | (17)        |
| <i>Encephalitozoon cuniculi</i>        | Microsporidia        | 1,996          | 22                    | 108           | 5.41% | (18)        |
| <i>Phytophthora sojae</i>              | Oomycetes            | 19,027         | 42                    | 919           | 4.83% | (19)        |
| <i>Phytophthora ramorum</i>            | Oomycetes            | 15,743         | 40                    | 641           | 4.07% | (19)        |
| <b>Total</b>                           |                      | 240,787        |                       | 10,785        | 4.46% | -           |

## \* References

1. Dean RA, Talbot NJ, Ebbole DJ, Farman ML, Mitchell TK, Orbach MJ, Thon M, Kulkarni R, Xu JR, Pan H, *et al.* (2005) *Nature* **434**, 980-986.
2. Cuomo CA, Guldener U, Xu JR, Trail F, Turgeon BG, Di Pietro A, Walton JD, Ma LJ, Baker SE, Rep M, *et al.* (2007) *Science* **317**, 1400-1402.
3. Galagan JE, Calvo SE, Borkovich KA, Selker EU, Read ND, Jaffe D, FitzHugh W, Ma LJ, Smirnov S, Purcell S, *et al.* (2003) *Nature* **422**, 859-868.
4. Espagne E, Lespinet O, Malagnac F, Da Silva C, Jaillon O, Porcel BM, Couloux A, Aury JM, Segurens B, Poulain J, *et al.* (2008) *Genome Biol* **9**, R77.
5. Hane JK, Lowe RG, Solomon PS, Tan KC, Schoch CL, Spatafora JW, Crous PW, Kodira C, Birren BW, Galagan JE, *et al.* (2007) *Plant Cell* **19**, 3347-3368.
6. Nierman WC, Pain A, Anderson MJ, Wortman JR, Kim HS, Arroyo J, Berriman M, Abe K, Archer DB, Bernejo C, *et al.* (2005) *Nature* **438**, 1151-1156.
7. Galagan JE, Calvo SE, Cuomo C, Ma LJ, Wortman JR, Batzoglou S, Lee SI, Basturkmen M, Spevak CC, Clutterbuck J, *et al.* (2005) *Nature* **438**, 1105-1115.
8. Dujon B, Sherman D, Fischer G, Durrrens P, Casaregola S, Lafontaine I, De Montigny J, Marck C, Neugeglise C, Talla E, *et al.* (2004) *Nature* **430**, 35-44.
9. Goffeau A, Barrell BG, Bussey H, Davis RW, Dujon B, Feldmann H, Galibert F, Hoheisel JD, Jacq C,

- Johnston M, *et al.* (1996) *Science* **274**, 546, 563-547.
10. Jones T, Federspiel NA, Chibana H, Dungan J, Kalman S, Magee BB, Newport G, Thorstenson YR, Agabian N, Magee PT, *et al.* (2004) *Proc Natl Acad Sci USA* **101**, 7329-7334.
  11. van het Hoog M, Rast TJ, Martchenko M, Grindle S, Dignard D, Hogues H, Cuomo C, Berriman M, Scherer S, Magee BB, *et al.* (2007) *Genome Biol* **8**, R52.
  12. Wood V, Gwilliam R, Rajandream MA, Lyne M, Lyne R, Stewart A, Sgouros J, Peat N, Hayles J, Baker S, *et al.* (2002) *Nature* **415**, 871-880.
  13. Loftus BJ, Fung E, Roncaglia P, Rowley D, Amedeo P, Bruno D, Vamathevan J, Miranda M, Anderson IJ, Fraser JA, *et al.* (2005) *Science* **307**, 1321-1324.
  14. Martinez D, Larrondo LF, Putnam N, Gelpke MD, Huang K, Chapman J, Helfenbein KG, Ramaiya P, Detter JC, Larimer F, *et al.* (2004) *Nat Biotechnol* **22**, 695-700.
  15. Martin F, Aerts A, Ahren D, Brun A, Danchin EG, Duchaussoy F, Gibon J, Kohler A, Lindquist E, Pereda V, *et al.* (2008) *Nature* **452**, 88-92.
  16. Kamper J, Kahmann R, Bolker M, Ma LJ, Brefort T, Saville BJ, Banuett F, Kronstad JW, Gold SE, Muller O, *et al.* (2006) *Nature* **444**, 97-101.
  17. Ma LJ, Ibrahim AS, Skory C, Grabherr MG, Burger G, Butler M, Elias M, Idnurm A, Lang BF, Sone T, *et al.* (2009) *PLoS Genet* **5**, e1000549.
  18. Katinka MD, Duprat S, Cornillot E, Metenier G, Thomarat F, Prensier G, Barbe V, Peyretailade E, Brottier P, Wincker P, *et al.* (2001) *Nature* **414**, 450-453.
  19. Tyler BM, Tripathy S, Zhang X, Dehal P, Jiang RH, Aerts A, Arredondo FD, Baxter L, Bensasson D, Beynon JL, *et al.* (2006) *Science* **313**, 1261-1266.
