# Supplementary material for: Global Expression Profiling of Transcription Factor Genes Provides New Insights into Pathogenicity and Stress Responses in the Rice Blast Fungus
Source: PubMed Central journal article supplement (PMC3675110; doi:10.1371/journal.ppat.1003350), 2013-06-06
Supplement: ppat.1003350.s009.pdf [file ppat.1003350.s009.pdf]

Table S3. Primers used to amplify potential reference genes needed for gene expression analyses

| Gene symbol*     | Gene locus version 6 | Forward primer (5'-3')  | Reverse primer (5'-3') | Amplicon (bp) |
|------------------|----------------------|-------------------------|------------------------|---------------|
| <i>β-tubulin</i> | MGG_00604.6          | ACAACTTCGTCTTCGGTCAG    | GTGATCTGGAAACCCTGGAG   | 203 bp        |
| <i>α-tubulin</i> | MGG_06650.6          | GCTGTCTGCGTTCTCTCC      | TACTCCGCCTCAATACCCT    | 230 bp        |
| <i>EF1β</i>      | MGG_04436.6          | AAGCCTTGGGATGATGAGAC    | AGCGACATCGGTGGACTGG    | 204 bp        |
| <i>UEP1</i>      | MGG_06044.6          | CTCTGGCCAGCAAGTTCAAC    | CGCCAAAGACCGTGATG      | 167 bp        |
| <i>Actin2</i>    | MGG_03982.6          | CTATCAACCCCAAGTCCAAC    | CAAGGAGAAACCCTCGTAAA   | 188 bp        |
| <i>GAPDH</i>     | MGG_01084.6          | TATCAACGGTTTCGGTCGTA    | AACTTGACCTTCTTGCCGTT   | 207 bp        |
| <i>CYP1</i>      | MGG_10447.6          | GCCTAACGTTTTCTTCGACATTC | GTTCTCGTCGGCAAACCTTCTC | 253 bp        |

\**EF1β*: elongation factor1-β; *UEP1*: ubiquitin extension protein gene; *GAPDH*: glyceraldehydes-3-phosphate dehydrogenase; *CYP1*: cyclophilin.
