# Supplementary material for: Global Expression Profiling of Transcription Factor Genes Provides New Insights into Pathogenicity and Stress Responses in the Rice Blast Fungus
Source: PubMed Central journal article supplement (PMC3675110; doi:10.1371/journal.ppat.1003350), 2013-06-06
Supplement: ppat.1003350.s011.pdf [file ppat.1003350.s011.pdf]

Table S5. List of TFs up-regulated under developmental conditions

|             | TF Family   | Locus       | TF name | Previously studied TFs                                                              | Homologues gene (Putative function)                                                                      |
|-------------|-------------|-------------|---------|-------------------------------------------------------------------------------------|----------------------------------------------------------------------------------------------------------|
| Conidiation | APSES       | MGG_08463.6 | TF010   | <i>MoAPS2</i>                                                                       | <i>Swi6</i> (regulation of cell cycle progression from G1 to S phase) in <i>S. cerevisiae</i>            |
|             | APSES       | MGG_09869.6 | TF011   | <i>MoAPS1</i>                                                                       | -                                                                                                        |
|             | bHLH        | MGG_01321.6 | TF003   |                                                                                     | -                                                                                                        |
|             | bHLH        | MGG_10837.6 | TF008   |                                                                                     | white collar-2 in <i>N. crassa</i> ; sexual development transcription factor in <i>A. nidulans</i>       |
|             | Forkhead    | MGG_01853.5 | FOK1    |                                                                                     | A minor role in the expression of G2/M phase genes in <i>S. cerevisiae</i>                               |
|             | Forkhead    | MGG_06422.5 | FOK3    |                                                                                     | Chromatin modification-related protein vid-21 in <i>P. anserina</i>                                      |
|             | Homeobox    | MGG_04853.6 | HOX1    | <i>MoHOX1</i>                                                                       | tRNA isopentenyltransferase in <i>A. Nidulans</i>                                                        |
|             | Homeobox    | MGG_00184.6 | HOX2    | <i>MoHOX2</i>                                                                       | -                                                                                                        |
|             | Homeobox    | MGG_01730.6 | HOX3    | <i>MoHOX3</i>                                                                       | <i>PTR2</i> (transcriptional repressor) in <i>S. cerevisiae</i>                                          |
|             | Homeobox    | MGG_06285.6 | HOX4    | <i>MoHOX4</i>                                                                       | -                                                                                                        |
|             | Homeobox    | MGG_11712.6 | HOX6    | <i>MoHOX6</i>                                                                       | -                                                                                                        |
|             | Homeobox    | MGG_12958.6 | HOX8    | <i>MoHOX8</i>                                                                       | TF that activated by a MAP kinase signaling cascade in <i>S. cerevisiae</i>                              |
|             | Myb         | MGG_00138.6 | TF041   |                                                                                     | -                                                                                                        |
|             | Myb         | MGG_01012.6 | TF042   |                                                                                     | Chromatin remodelling complex ATPase chain ISW1 in <i>N. crassa</i>                                      |
|             | Myb         | MGG_01426.6 | TF044   |                                                                                     | nitrate nonutilizer-4 in <i>N. crassa</i> ; nitrogen assimilation TF <i>nirA</i> in <i>A. nidulans</i> . |
|             | Myb         | MGG_02746.6 | TF046   |                                                                                     | nitrate nonutilizer-2 in <i>N. crassa</i> ; regulatory protein areA in <i>A. nidulans</i> .              |
|             | Myb         | MGG_05099.6 | TF048   |                                                                                     | Transcription coactivator in <i>S. cerevisiae</i>                                                        |
|             | Myb         | MGG_05240.6 | TF049   |                                                                                     | Regulation of basal and induced expression in <i>S. cerevisiae</i>                                       |
|             | Myb         | MGG_05748.6 | TF050   |                                                                                     | -                                                                                                        |
|             | Myb         | MGG_06434.6 | TF053   |                                                                                     | <i>TamA</i> in <i>N. crassa</i>                                                                          |
|             | GATA        | MGG_02755.6 | TF031   |                                                                                     | Transcriptional activator for nitrogen catabolite repression in <i>S. cerevisiae</i>                     |
|             | GATA        | MGG_07319.6 | TF035   |                                                                                     | <i>Gln3p</i> and <i>Dal80p</i> ; expression repressed by leucine in <i>S. cerevisiae</i>                 |
|             | C2H2        | MGG_00139.6 | TF058   |                                                                                     | E3 ubiquitin-protein ligase <i>BRE1</i>                                                                  |
|             | C2H2        | MGG_01171.6 | TF059   |                                                                                     | -                                                                                                        |
|             | C2H2        | MGG_09837.6 | TF068   |                                                                                     | <i>Swi6</i> in <i>N. crassa</i> , <i>A. nidulans</i> , <i>P. anserina</i> , and <i>F. graminearum</i>    |
|             | C2H2        | MGG_00702.6 | TF070   |                                                                                     | -                                                                                                        |
|             | C2H2        | MGG_02447.6 | TF073   |                                                                                     | -                                                                                                        |
|             | C2H2        | MGG_08340.6 | TF085   |                                                                                     | -                                                                                                        |
|             | C2H2        | MGG_00373.6 | TF094   |                                                                                     | -                                                                                                        |
|             | C2H2        | MGG_02474.6 | TF116   |                                                                                     | Activates expression of early G1-specific genes in <i>S. cerevisiae</i>                                  |
|             | C2H2        | MGG_02505.6 | TF117   |                                                                                     | -                                                                                                        |
|             | C2H2        | MGG_11252.6 | TF133   |                                                                                     | -                                                                                                        |
|             | C2H2        | MGG_02845.6 | TF134   |                                                                                     | <i>xlnR</i> (transcriptional activator) in <i>N. crassa</i> and <i>P. anserina</i>                       |
|             | C2H2        | MGG_06507.6 | TF150   |                                                                                     | Induction of <i>CLN3</i> transcription in response to glucose in <i>S. cerevisiae</i>                    |
|             | C2H2        | MGG_08114.6 | TF155   |                                                                                     | -                                                                                                        |
|             | Zn2Cys6     | MGG_00672.6 | TF165   | <i>MoLEU3</i>                                                                       | -                                                                                                        |
|             | Zn2Cys6     | MGG_00934.6 | TF166   |                                                                                     | Glucose-responsive TF in <i>S. cerevisiae</i>                                                            |
|             | Zn2Cys6     | MGG_01518.6 | TF169   | <i>MoNIT4</i>                                                                       | Arsenite resistance protein <i>Ars2</i> in <i>N. crassa</i>                                              |
|             | Zn2Cys6     | MGG_01777.6 | TF173   |                                                                                     | Lactose regulatory protein <i>LAC9</i> in <i>P. anserina</i>                                             |
|             | Zn2Cys6     | MGG_01833.6 | TF175   |                                                                                     | Siderophore regulation in <i>N. crassa</i> ; <i>SREA</i> in <i>A. nidulans</i> .                         |
|             | Zn2Cys6     | MGG_02377.6 | TF180   |                                                                                     | -                                                                                                        |
|             | Zn2Cys6     | MGG_03711.6 | TF192   |                                                                                     | Transcriptional activator for derepression of a variety of genes in <i>S. cerevisiae</i>                 |
|             | Zn2Cys6     | MGG_04951.6 | TF206   |                                                                                     | -                                                                                                        |
|             | Zn2Cys6     | MGG_06243.6 | TF220   |                                                                                     | -                                                                                                        |
|             | Zn2Cys6     | MGG_06279.6 | TF221   |                                                                                     | -                                                                                                        |
|             | Zn2Cys6     | MGG_07063.6 | TF230   |                                                                                     | -                                                                                                        |
|             | Zn2Cys6     | MGG_07131.6 | TF231   |                                                                                     | Regulation of lysine biosynthesis pathway in <i>S. cerevisiae</i> ; <i>RfeC</i> in <i>N. crassa</i> .    |
| Zn2Cys6     | MGG_07218.6 | TF233       |         | Activation of the <i>GAL</i> genes in response to galactose in <i>S. cerevisiae</i> |                                                                                                          |
| Zn2Cys6     | MGG_07681.6 | TF241       |         | -                                                                                   |                                                                                                          |
| Zn2Cys6     | MGG_08094.6 | TF246       |         | <i>SWR1</i> -complex protein 4 in <i>N. crassa</i> .                                |                                                                                                          |
| Zn2Cys6     | MGG_09263.6 | TF260       |         | -                                                                                   |                                                                                                          |
| Zn2Cys6     | MGG_09312.6 | TF263       |         | Activation of the <i>GAL</i> genes in response to galactose in <i>S. cerevisiae</i> |                                                                                                          |
| Zn2Cys6     | MGG_12037.6 | TF264       |         | -                                                                                   |                                                                                                          |
| Zn2Cys6     | MGG_09825.6 | TF268       |         | -                                                                                   |                                                                                                          |
| Zn2Cys6     | MGG_09829.6 | TF269       |         | Vacuolar segregation protein <i>pep7</i> in <i>N. crassa</i> .                      |                                                                                                          |
| Zn2Cys6     | MGG_09950.6 | TF271       |         | pH-response transcription factor <i>pacC/RIM101</i> in <i>N. crassa</i> .           |                                                                                                          |
| Zn2Cys6     | MGG_10528.6 | TF276       |         | -                                                                                   |                                                                                                          |
| Germination | bHLH        | MGG_00595.6 | TF001   |                                                                                     | -                                                                                                        |
|             | bHLH        | MGG_10575.6 | TF007   |                                                                                     | -                                                                                                        |
|             | C2H2        | MGG_01127.6 | TF142   |                                                                                     | Stimulates expression of proteasome genes in <i>S. cerevisiae</i>                                        |

|                        |          |             |       |                                                                                                      |
|------------------------|----------|-------------|-------|------------------------------------------------------------------------------------------------------|
|                        | Myb      | MGG_06120.6 | TF052 | UBX domain-containing protein in <i>N. crassa</i>                                                    |
|                        | Myb      | MGG_08137.6 | TF056 | -                                                                                                    |
| Appressorium formation | C2H2     | MGG_09035.6 | TF086 | -                                                                                                    |
|                        | C2H2     | MGG_05518.6 | TF078 | -                                                                                                    |
|                        | Zn2Cys6  | MGG_01946.6 | TF178 | -                                                                                                    |
|                        | Zn2Cys6  | MGG_15023.6 | TF184 | -                                                                                                    |
|                        | Zn2Cys6  | MGG_15346.6 | TF253 | -                                                                                                    |
|                        | Zn2Cys6  | MGG_06954.6 | TF229 | Sterol regulatory element binding protein in <i>S. cerevisiae</i>                                    |
|                        | Zn2Cys6  | MGG_15085.6 | TF234 | Transcriptional regulator involved in the stress response in <i>S. cerevisiae</i>                    |
|                        | Zn2Cys6  | MGG_09276.6 | TF262 | -                                                                                                    |
| All the conditions     | bHLH     | MGG_05709.6 | TF006 | -                                                                                                    |
|                        | C2H2     | MGG_00076.6 | TF069 | <i>Sip-5</i> in <i>N. crassa</i>                                                                     |
|                        | C2H2     | MGG_03581.6 | TF118 | -                                                                                                    |
|                        | C2H2     | MGG_02775.6 | TF100 | Transcriptional regulation of the methionine biosynthetic genes in <i>S. cerevisiae</i>              |
|                        | C2H2     | MGG_04699.6 | TF101 | <i>kaleidoscope-1</i> in <i>N. crassa</i> .                                                          |
|                        | C2H2     | MGG_10280.6 | TF090 | -                                                                                                    |
|                        | C2H2     | MGG_07011.6 | TF104 | -                                                                                                    |
|                        | C2H2     | MGG_08015.6 | TF106 | -                                                                                                    |
|                        | C2H2     | MGG_09701.6 | TF131 | Melanization defective-1 in <i>N. crassa</i>                                                         |
|                        | C2H2     | MGG_05714.6 | TF154 | Activates expression of early G1-specific genes in <i>S. cerevisiae</i>                              |
|                        | Homeobox | MGG_12865.6 | HOX7  | <i>MoHox7</i> protoperithecium-1 in <i>N. crassa</i> ; <i>SteA</i> in <i>A. nidulans</i>             |
|                        | Myb      | MGG_06898.6 | TF054 | <i>APF1</i> in <i>N. crassa</i> ; antigenic determinant of <i>recA</i> protein in <i>A. nidulans</i> |
|                        | Zn2Cys6  | MGG_01285.6 | TF167 | -                                                                                                    |
|                        | Zn2Cys6  | MGG_05343.6 | TF210 | -                                                                                                    |
|                        | Zn2Cys6  | MGG_00320.6 | TF161 | Acridiflavine sensitivity control protein <i>acr-2</i>                                               |
|                        | Zn2Cys6  | MGG_01624.6 | TF170 | -                                                                                                    |
|                        | Zn2Cys6  | MGG_14900.6 | TF199 | Telomere uncapping and elongation as component in <i>S. cerevisiae</i>                               |
|                        | Zn2Cys6  | MGG_05939.6 | TF218 | -                                                                                                    |
|                        | Zn2Cys6  | MGG_10197.6 | TF272 | -                                                                                                    |
|                        | Zn2Cys6  | MGG_10422.6 | TF275 | -                                                                                                    |
|                        | Zn2Cys6  | MGG_00021.6 | TF158 | -                                                                                                    |
|                        | Zn2Cys6  | MGG_00049.6 | TF159 | -                                                                                                    |
|                        | Zn2Cys6  | MGG_02880.6 | TF186 | -                                                                                                    |
|                        | Zn2Cys6  | MGG_06492.6 | TF226 | Positive regulator in multiple nitrogen degradation pathways in <i>S. cerevisiae</i>                 |
|                        | Zn2Cys6  | MGG_06832.6 | TF228 | -                                                                                                    |
|                        | Zn2Cys6  | MGG_07845.6 | TF244 | <i>RING-6</i> in <i>N. crassa</i> and <i>F. graminearum</i>                                          |
|                        | Zn2Cys6  | MGG_08199.6 | TF249 | -                                                                                                    |
|                        | Zn2Cys6  | MGG_08314.6 | TF250 | Unknown function that may interact with ribosomes in <i>S. cerevisiae</i>                            |
|                        | Zn2Cys6  | MGG_08753.6 | TF255 | -                                                                                                    |
|                        | Zn2Cys6  | MGG_08917.6 | TF257 | Transcriptional activator of proline utilization genes in <i>S. cerevisiae</i>                       |
|                        | Zn2Cys6  | MGG_10802.6 | TF278 | Positively regulates transcription in <i>S. cerevisiae</i>                                           |

|  |                                                              |
|--|--------------------------------------------------------------|
|  | : <i>M. oryzae</i> specific TFs                              |
|  | : Reduction of conidia production by T-DNA insertion mutants |
|  | : Production of abnormal conidia by T-DNA insertion mutants  |
|  | : No conidia production                                      |
