# Supplementary material for: Global Expression Profiling of Transcription Factor Genes Provides New Insights into Pathogenicity and Stress Responses in the Rice Blast Fungus
Source: PLoS Pathog. 2013 Jun 6;9(6):e1003350. doi: 10.1371/journal.ppat.1003350 (PMC3675110; doi:10.1371/journal.ppat.1003350)
Supplement: Table S2 — Distribution of putative homologues of 26 Magnaporthe oryzae -specific transcription factor genes analyzed using Blast Matrix and InParanoid algorism. (PDF) [file ppat.1003350.s008.pdf]

Table S2. Distribution of putative homologues of 26 *Magnaporthe oryzae*-specific transcription factor genes analyzed using Blast Matrix and InParanoid algorithm

| TF families            | Protein Name | Kingdom | Chromista    | Fungi      |              |                 |                       |                |                |               |                 |    |     |    |    |     |    |               |                |                      |             |                   |                     |                 | Metazoa      |            |            | Viridiplantae |            | No orthologues found by InParanoid |              |            |              |    |             |             |             |
|------------------------|--------------|---------|--------------|------------|--------------|-----------------|-----------------------|----------------|----------------|---------------|-----------------|----|-----|----|----|-----|----|---------------|----------------|----------------------|-------------|-------------------|---------------------|-----------------|--------------|------------|------------|---------------|------------|------------------------------------|--------------|------------|--------------|----|-------------|-------------|-------------|
|                        |              | Phylum  | Opisthokonta | Ascomycota |              |                 |                       |                |                |               |                 |    |     |    |    |     |    | Basidiomycota |                |                      |             |                   | Blastocladiomycota  | Chytridiomycota | Microporidia | Zygomycota | Arthropoda | Chordata      | Neumetazoa |                                    | Streptophyta |            |              |    |             |             |             |
|                        |              |         |              | Class      | Opisthokonta | Saccharomycetes | Schizosaccharomycetes | Eurotiomycetes | Eurotiomycetes | Leotiomycetes | Sordariomycetes |    |     |    |    |     |    |               | Aecariomycetes | Heterobasidiomycetes | Not defined | Ustilaginomycetes | Blastocladiomycetes | Not defined     |              |            |            | Insecta       | Mammalia   |                                    | Chromadorea  | Liliopsida | Eurosidia II |    |             |             |             |
|                        |              |         |              |            |              |                 |                       |                |                |               | Species         | Pi | Cas | Sc | Sp | Mgr | Sn | Af1           |                |                      |             |                   |                     | An              | Bc           | Fg         | Fol        |               |            |                                    |              |            |              | Fs | Mo          | Nc          | Pa          |
| Zn2Cys6                | MGG_00021.6  | -       | -            | -          | -            | -               | -                     | -              | -              | -             | -               | -  | -   | -  | -  | -   | -  | -             | -              | -                    | -           | -                 | -                   | -               | -            | -          | -          | -             | -          | -                                  | -            | -          | -            | -  | -           | MGG_00021.6 |             |
|                        | MGG_02600.6  | -       | +            | +          | +            | +               | +                     | +              | +              | +             | +               | +  | +   | +  | +  | +   | +  | +             | +              | +                    | +           | +                 | -                   | +               | -            | +          | -          | +             | +          | -                                  | -            | -          | -            | -  | -           | MGG_02600.6 |             |
|                        | MGG_04326.6  | -       | -            | -          | -            | +               | +                     | +              | +              | +             | +               | +  | +   | +  | -  | +   | +  | +             | -              | +                    | -           | +                 | -                   | +               | -            | -          | -          | -             | -          | -                                  | -            | -          | -            | -  | MGG_04326.6 |             |             |
|                        | MGG_04360.6  | -       | -            | -          | +            | -               | +                     | +              | -              | +             | +               | +  | +   | +  | +  | -   | +  | +             | -              | -                    | -           | -                 | -                   | +               | -            | -          | -          | +             | -          | -                                  | -            | -          | -            | -  | MGG_04360.6 |             |             |
|                        | MGG_05845.6  | -       | -            | -          | -            | -               | -                     | -              | -              | -             | -               | -  | +   | +  | -  | -   | -  | +             | -              | -                    | -           | -                 | -                   | -               | -            | -          | -          | -             | -          | -                                  | -            | -          | -            | -  | -           | MGG_05845.6 |             |
| MHG                    | MGG_02978.6  | -       | +            | +          | +            | +               | +                     | +              | +              | +             | +               | +  | +   | +  | +  | +   | +  | +             | +              | +                    | +           | +                 | +                   | +               | +            | +          | +          | -             | +          | +                                  | +            | +          | +            | +  | -           | +           | MGG_02978.6 |
|                        | MGG_02979.6  | -       | +            | +          | +            | -               | -                     | +              | -              | +             | +               | +  | +   | +  | +  | +   | +  | +             | +              | +                    | +           | +                 | +                   | +               | +            | +          | -          | +             | +          | +                                  | +            | +          | +            | -  | -           | -           | MGG_02979.6 |
|                        | MGG_04570.6  | +       | -            | -          | -            | +               | -                     | +              | +              | +             | +               | +  | +   | +  | +  | +   | +  | +             | +              | +                    | +           | +                 | +                   | +               | +            | +          | -          | -             | +          | +                                  | +            | +          | +            | +  | +           | MGG_04570.6 |             |
|                        | MGG_05369.6  | +       | -            | -          | -            | +               | -                     | +              | -              | +             | +               | +  | +   | +  | +  | +   | +  | -             | +              | +                    | +           | +                 | +                   | +               | -            | +          | -          | +             | -          | -                                  | +            | +          | +            | -  | +           | MGG_05369.6 |             |
|                        | MGG_07057.6  | -       | -            | +          | -            | -               | +                     | +              | +              | +             | +               | +  | +   | +  | +  | +   | +  | +             | +              | +                    | +           | +                 | +                   | +               | +            | -          | -          | -             | +          | +                                  | +            | +          | +            | +  | +           | MGG_07057.6 |             |
|                        | MGG_07674.6  | +       | +            | +          | +            | +               | +                     | +              | +              | +             | +               | +  | +   | +  | +  | +   | +  | +             | +              | +                    | +           | +                 | +                   | +               | +            | +          | +          | +             | +          | +                                  | +            | +          | +            | +  | -           | +           | MGG_07674.6 |
|                        | MGG_09739.6  | +       | -            | -          | +            | +               | +                     | +              | +              | -             | +               | +  | +   | +  | +  | +   | +  | +             | +              | +                    | +           | +                 | +                   | +               | +            | +          | -          | -             | +          | +                                  | +            | +          | +            | +  | +           | +           | MGG_09739.6 |
|                        | MGG_13742.6  | +       | +            | +          | +            | +               | +                     | +              | +              | +             | +               | +  | +   | +  | +  | +   | +  | +             | +              | +                    | +           | +                 | +                   | +               | +            | +          | -          | +             | +          | +                                  | +            | +          | +            | +  | -           | +           | MGG_13742.6 |
| MGG_15309.6            | -            | -       | -            | +          | +            | +               | +                     | +              | -              | -             | +               | +  | +   | +  | +  | +   | +  | +             | +              | +                    | +           | +                 | +                   | -               | +            | -          | -          | +             | -          | -                                  | +            | -          | +            | +  | MGG_15309.6 |             |             |
| C2H2                   | MGG_14358.6  | -       | -            | -          | -            | -               | -                     | -              | +              | +             | +               | +  | -   | +  | -  | +   | +  | -             | -              | -                    | +           | -                 | -                   | -               | -            | -          | -          | -             | -          | -                                  | -            | +          | -            | -  | MGG_14358.6 |             |             |
| Homeodomain-like       | MGG_09628.6  | -       | -            | -          | -            | -               | -                     | -              | -              | -             | -               | -  | -   | +  | +  | +   | +  | +             | +              | +                    | +           | +                 | +                   | +               | +            | +          | +          | +             | +          | +                                  | +            | +          | +            | +  | +           | MGG_09628.6 |             |
|                        | MGG_14987.6  | -       | -            | -          | -            | -               | -                     | -              | -              | -             | -               | +  | +   | +  | -  | -   | -  | -             | -              | -                    | -           | -                 | -                   | -               | -            | -          | -          | -             | -          | -                                  | -            | -          | -            | -  | MGG_14987.6 |             |             |
| CCHC                   | MGG_01763.6  | -       | -            | -          | +            | -               | +                     | -              | -              | +             | -               | -  | -   | +  | +  | -   | -  | +             | -              | -                    | -           | -                 | -                   | +               | +            | -          | +          | -             | -          | -                                  | -            | -          | -            | -  | -           | +           | MGG_01763.6 |
|                        | MGG_08239.6  | +       | +            | +          | +            | +               | +                     | -              | +              | +             | +               | +  | +   | +  | +  | +   | +  | +             | +              | +                    | +           | +                 | +                   | +               | +            | +          | -          | +             | +          | +                                  | +            | +          | +            | +  | +           | +           | MGG_08239.6 |
|                        | MGG_15341.6  | -       | -            | -          | -            | -               | -                     | -              | -              | -             | -               | -  | -   | +  | +  | -   | -  | -             | -              | -                    | -           | -                 | -                   | -               | -            | -          | -          | -             | -          | -                                  | -            | -          | -            | -  | MGG_15341.6 |             |             |
| Winged helix repressor | MGG_15412.6  | -       | -            | -          | -            | -               | -                     | -              | -              | -             | -               | -  | -   | +  | +  | -   | -  | -             | -              | -                    | -           | -                 | -                   | -               | -            | -          | -          | -             | -          | -                                  | -            | -          | -            | -  | -           | MGG_15412.6 |             |
|                        | MGG_03277.6  | -       | -            | -          | -            | -               | -                     | -              | -              | -             | -               | -  | -   | +  | +  | -   | -  | -             | -              | -                    | -           | -                 | -                   | -               | -            | -          | -          | -             | -          | -                                  | -            | -          | -            | -  | MGG_03277.6 |             |             |
| GATA                   | MGG_07423.6  | -       | -            | -          | -            | -               | -                     | -              | -              | -             | -               | -  | -   | +  | +  | +   | +  | +             | +              | +                    | +           | +                 | +                   | +               | +            | +          | +          | +             | +          | +                                  | +            | +          | +            | +  | +           | MGG_07423.6 |             |
|                        | MGG_10970.6  | -       | +            | +          | -            | +               | +                     | +              | +              | +             | +               | +  | +   | +  | +  | +   | +  | +             | +              | +                    | +           | +                 | +                   | +               | +            | +          | +          | +             | +          | +                                  | +            | +          | +            | +  | +           | MGG_10970.6 |             |
| GRF-type               | MGG_08489.6  | -       | -            | -          | -            | +               | -                     | -              | -              | +             | +               | +  | +   | +  | +  | +   | +  | +             | -              | +                    | +           | -                 | -                   | +               | +            | -          | -          | -             | -          | -                                  | -            | -          | -            | -  | -           | MGG_08489.6 |             |
| mbda repressor-like    | MGG_11615.6  | +       | +            | +          | +            | +               | +                     | +              | +              | +             | +               | +  | +   | +  | +  | +   | +  | +             | +              | +                    | +           | +                 | +                   | +               | +            | +          | -          | +             | +          | +                                  | +            | +          | +            | +  | +           | MGG_11615.6 |             |

: 1e-100 ; 
 : 1e-50 ; 
 : 1e-30 ; 
 : 1e-10 ; 
 : None

\*Abbreviation for fungal species and other organisms: Pi: *Phytophthora infestans*; Cas: *Candida albicans* SC5314; Sc: *Saccharomyces cerevisiae* S288C; Sp: *Schizosaccharomyces pombe*; Mgr: *Mycosphaerella graminicola*; Sn: *Stagonospora nodorum*; Af1: *Aspergillus fumigatus* Af293; An: *Aspergillus nidulans* 4; Bc: *Botrytis cinerea*; Fg: *Fusarium graminearum*; Fol: *Fusarium oxysporum*; Fs: *Nectria haematococca* (F. solani); Mo: *Magnaporthe oryzae* 70-15; Nc: *Neurospora crassa*; Pa: *Podospira anserina*; Tr: *Trichoderma reesei*; Vd: *Verticillium dahliae* VdLs.17; Ds: *Dichomitus squalens*; Ha: *Heterobasidion annosum*; Pc: *Phanerochaete chrysosporium*; Cn: *Cryptococcus neoformans* variety gatti (serotype A); Pg: *Puccinia graminis*; Um: *Ustilago maydis* 521; Am: *Allomyces macrogynus*; BdJ: *Batrachochytrium dendrobatidis* JAM81; Ec: *Encephalitozoon cuniculi*; Pbl: *Phycomyces blakesleeana*; Ro: *Rhizopus oryzae*; Dm: *Drosophila melanogaster*; Hs: *Homo sapiens*; Ce: *Caenorhabditis elegans*; OsJ: *Oryza sativa* japonica; Ath: *Arabidopsis thaliana*.
